# Supplementary material
Source: PubMed Central journal article supplement (PMC7735772)
Supplement: djaa034_supplementary_data.pdf [file djaa034_supplementary_data.pdf]

Supplementary Table 1:  
Multivariate Cancer Specific Survival\* of Squamous Cell Carcinoma of NSLCLC - Excluding Treatment

| Characteristic                    | HR   | HR<br>LCL | HR<br>UCL | HR<br>p-value** | Class-<br>Level p-<br>value** |
|-----------------------------------|------|-----------|-----------|-----------------|-------------------------------|
| Year of Diagnosis                 |      |           |           |                 |                               |
| 2007                              | 1.00 | (Ref)     | (Ref)     | --              | <0.001                        |
| 2008                              | 0.99 | 0.86      | 1.12      | 0.82            | .                             |
| 2009                              | 0.94 | 0.82      | 1.07      | 0.33            | .                             |
| 2010                              | 0.96 | 0.84      | 1.10      | 0.58            | .                             |
| 2011                              | 0.86 | 0.75      | 0.98      | 0.02            | .                             |
| 2012                              | 1.00 | 0.88      | 1.14      | 0.99            | .                             |
| 2013                              | 0.93 | 0.82      | 1.06      | 0.28            | .                             |
| 2014                              | 0.91 | 0.80      | 1.03      | 0.13            | .                             |
| 2015                              | 0.72 | 0.61      | 0.84      | <.001           | .                             |
| Age, years                        |      |           |           |                 |                               |
| 66 to 69                          | 1.00 | (Ref)     | (Ref)     | --              | <0.001                        |
| 70 to 74                          | 1.05 | 0.97      | 1.14      | 0.26            | .                             |
| 75 and Older                      | 1.25 | 1.16      | 1.36      | <.001           | .                             |
| Sex                               |      |           |           |                 |                               |
| Male                              | 1.00 | (Ref)     | (Ref)     | --              | <0.001                        |
| Female                            | 0.86 | 0.81      | 0.92      | <.001           | .                             |
| Race/Ethnicity                    |      |           |           |                 |                               |
| White NH                          | 1.00 | (Ref)     | (Ref)     | --              | 0.11                          |
| Black NH                          | 0.87 | 0.78      | 0.98      | 0.02            | .                             |
| Hispanic                          | 0.97 | 0.84      | 1.13      | 0.73            | .                             |
| Other                             | 1.04 | 0.91      | 1.19      | 0.59            | .                             |
| Marital Status                    |      |           |           |                 |                               |
| Married or Partnered              | 1.00 | (Ref)     | (Ref)     | --              | 0.003                         |
| Non-Married                       | 1.13 | 1.06      | 1.21      | <0.001          | .                             |
| Patient Residence <sup>†</sup>    |      |           |           |                 |                               |
| Urban Commute                     | 1.00 | (Ref)     | (Ref)     | --              | 0.12                          |
| Non-Urban Commute                 | 1.08 | 0.98      | 1.18      | 0.12            | .                             |
| Census Tract Poverty <sup>‡</sup> |      |           |           |                 |                               |
| Less than median level            | 1.00 | (Ref)     | (Ref)     | --              | 0.83                          |

|                                                  |      |       |       |       |        |
|--------------------------------------------------|------|-------|-------|-------|--------|
| Greater than or equal to median level            | 1.01 | 0.94  | 1.08  | 0.83  | .      |
| Census Tract Education                           |      |       |       |       |        |
| Less than median level                           | 1.00 | (Ref) | (Ref) | --    | 0.78   |
| Greater than or equal to median level            | 1.01 | 0.94  | 1.09  | 0.79  | .      |
| Charlson Comorbidity                             |      |       |       |       |        |
| 0                                                | 1.00 | (Ref) | (Ref) | --    | 0.14   |
| 1                                                | 0.99 | 0.91  | 1.07  | 0.76  | .      |
| 2 or more                                        | 1.06 | 0.98  | 1.15  | 0.16  | .      |
| AJCC <sup>§</sup> Stage Group 6 <sup>th</sup> Ed |      |       |       |       |        |
| Stage I                                          | 1.00 | (Ref) | (Ref) | --    | <0.001 |
| Stage II                                         | 1.83 | 1.57  | 2.13  | <.001 | .      |
| Stage III                                        | 3.34 | 3.01  | 3.72  | <.001 | .      |
| Stage IV                                         | 6.15 | 5.55  | 6.83  | <.001 | .      |
| MRI Brain Imaging                                |      |       |       |       |        |
| No MRI Brain                                     | 1.00 | (Ref) | (Ref) | --    | <0.001 |
| MRI Brain                                        | 1.18 | 1.11  | 1.25  | <.001 | .      |
| Initial Imaging                                  |      |       |       |       |        |
| CT <sup>  </sup> Alone                           | 1.00 | (Ref) | (Ref) | --    | <0.001 |
| PET <sup>¶</sup>                                 | 0.53 | 0.49  | 0.56  | <.001 | .      |
| Treatment Facility                               |      |       |       |       |        |
| Other Facility                                   | 1.00 | (Ref) | (Ref) | --    | 0.009  |
| NCI Center <sup>#</sup>                          | 0.80 | 0.68  | 0.93  | 0.005 | .      |
| Teaching Hospital                                | 0.93 | 0.87  | 1.000 | 0.05  | .      |

\*Cancer specific survival was estimated using Cox proportional hazard model.

\*\* p-values were calculated using a two-sided Chi Square method.

†Urban/rural classification is based on US Department of Agriculture's Rural Urban Commuting Area Codes

‡Area-level poverty defined at the census tract and for those with few observations, area level is at the zip code.

§ American Joint Committee on Cancer

|| Computerized tomography imaging

¶ Positron emission tomography imaging

#National Cancer Institute
